# Supplementary material
Source: Springer Nature journal article supplement (https://www.springermedizin.de/resource/supplementary/12890_2009_149_MOESM2_ESM.pdf/9506090)
Supplement: MOESM2 [file 9506090]

|       |          | Disease                         | No Disease                       |            |
|-------|----------|---------------------------------|----------------------------------|------------|
| Test  | positive | Right positive<br><b>a = 72</b> | False positive<br><b>b = 9</b>   | <b>81</b>  |
|       | negative | False negative<br><b>c = 48</b> | Right negative<br><b>d = 171</b> |            |
| Total |          | <b>120</b>                      | <b>180</b>                       | <b>300</b> |

Pretest probability of having the disease (p): is the prevalence of disease in the investigated population

Pretest probability of not having the disease (1-p): is the prevalence of healthy subjects in the investigated population

Sensitivity (sens): is the proportion of people with disease who have a positive test

Specificity (spec): is the proportion of people free of a disease who have a negative test

Positive predictive value (PPV): probability that a patient with a positive test has got really the disease

Negative predictive value (NPV): probability that a patient with a negative test is really healthy

$$p = a+c/a+b+c+d = 40\%$$

$$1-p = b+d/a+b+c+d = 60\%$$

$$\text{sens} = a/a+c = 60\%$$

$$\text{spec} = d/b+d = 95\%$$

$$\text{PPV} = a/a+b = 89\%$$

$$\text{NPV} = d/c+d = 78\%$$

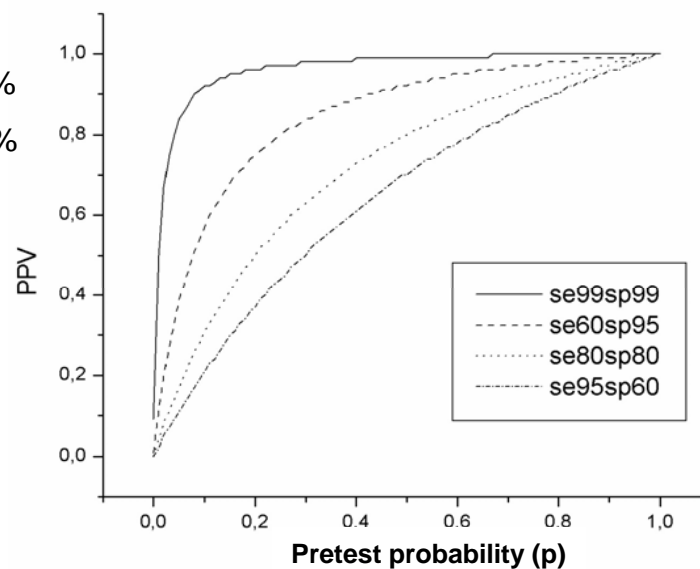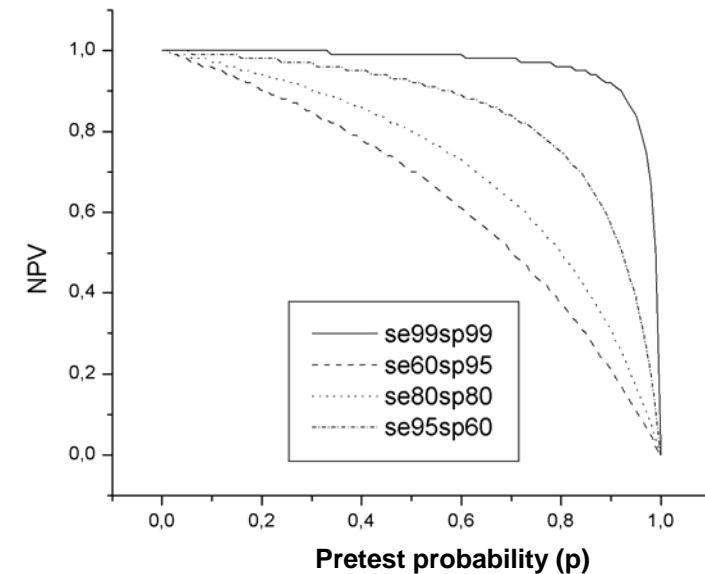

This example illustrates, that a test is useful when the pretest probability is increased up to a reasonable PPV (rule in the disease) or when NPV is increased reasonably (rule out). The figures illustrate that specificity is more important to rule in (spin = specificity rule in); and that sensitivity is more important to rule out (snout = sensitivity rule out). The relation between p, sens, spez, PPV and NPV is described by the Bayes' Theorem. Indeed a test is only useful, if the pretest probability (p) is out of the range of 95%CI of PPV (in this example 95%CI = 80%-94%); and/or if the pretest probability of not having the disease (1-p) is out of the range of the 95%CI of NPV (in this example 95% CI = 72%-83%). The 95%CI is calculated using Wilson's method.<sup>28</sup>

In this example p is increased up to a meaningful PPV. NPV seems not to be increased reasonably if compared with 1-p.
